# Supplementary material for: Coordinated downregulation of Spinophilin and the catalytic subunits of PP1, PPP1CA/B/C, contributes to a worse prognosis in lung cancer
Source: PubMed Central journal article supplement (PMC5739631; doi:10.18632/oncotarget.22111), 2017-10-26
Supplement: oncotarget-08-105196-s001.pdf [file oncotarget-08-105196-s001.pdf]

# Coordinated downregulation of Spinophilin and the catalytic subunits of PP1, PPP1CA/B/C, contributes to a worse prognosis in lung cancer

## SUPPLEMENTARY MATERIALS

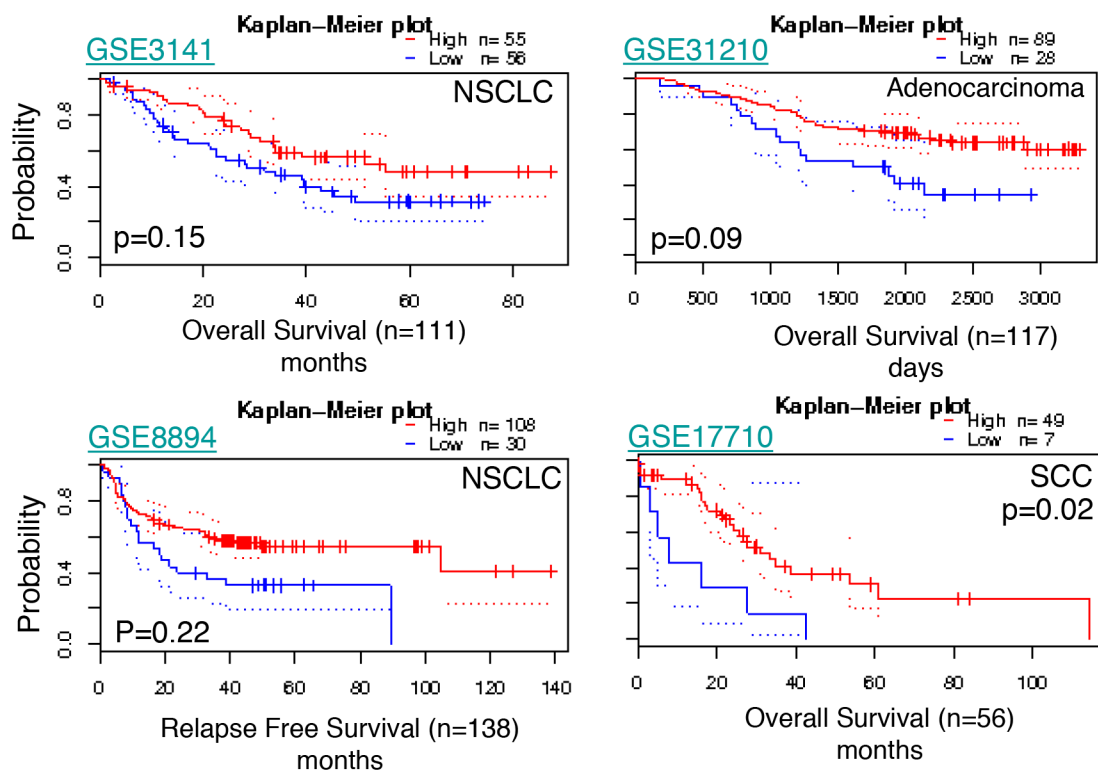

Supplementary Figure 1: Survival probability of patients with lung cancer according to Spinophilin levels in different lung cancer patient cohorts as indicated.

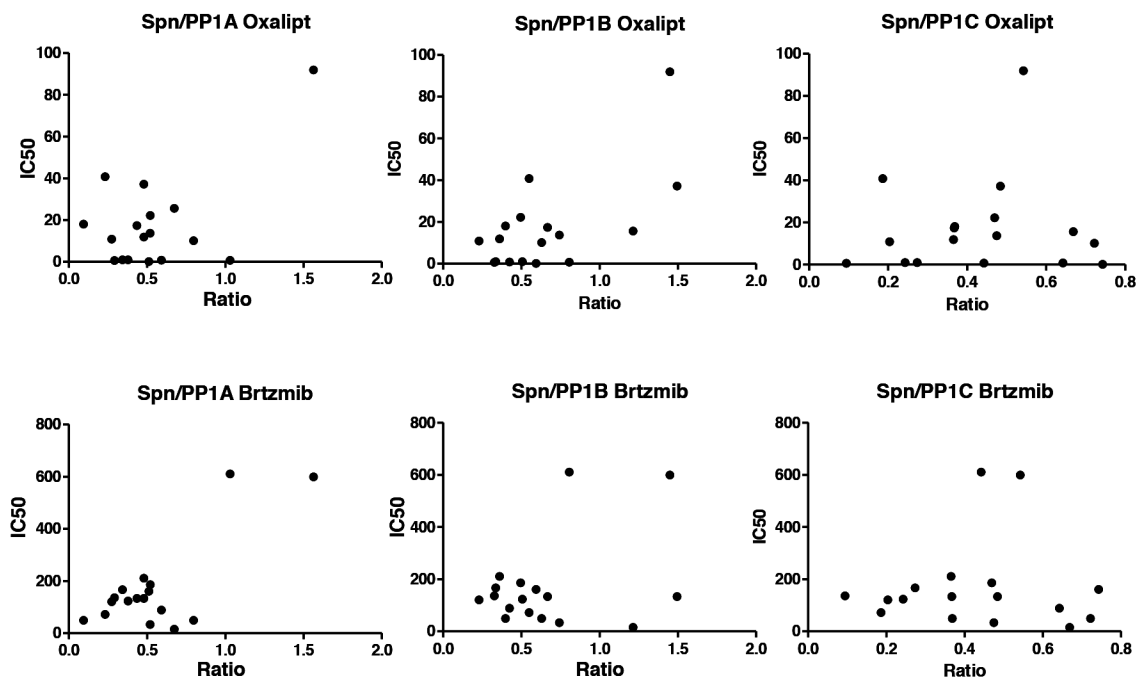

Supplementary Figure 2: Graphs of the correlation between Oxaliptin (Oxlipt) or Bortezomib (Brtzmib) and the ratios Spinophilin/PPP1CA (Spn/PP1A), Spinophilin/PPP1CB (Spn/PP1B), Spinophilin/PPP1CC (Spn/PP1C). (Pearson correlation).

Supplementary Table 1: Clinicopathological characteristics of the NSCLC cohort number 1

See Supplementary File 1

**Supplementary Table 2: Characteristics of the lung cancer patient cohort used in the methylation assay. Cohort number 2**

|                           | Patients (N=47)  |
|---------------------------|------------------|
| <b>Gender</b>             |                  |
| Male                      | 76.6 (36)        |
| Female                    | 23.4 (11)        |
| <b>Age (years)</b>        | 67 [60–73]       |
| <b>Smoking status</b>     |                  |
| Smokers                   | 40.4 (19)        |
| Ex-smokers                | 44.7 (21)        |
| Non-smoker                | 14.9 (7)         |
| <b>Packs-year</b>         | 41.0 [20.0-65.7] |
| <b>Histology</b>          |                  |
| Lung adenocarcinoma       | 57.4 (27)        |
| Squamous cell carcinoma   | 42.6 (20)        |
| <b>Staging</b>            |                  |
| Stage I                   | 40.5 (19)        |
| Stage II                  | 38.3 (18)        |
| Stage III-IV              | 21.2 (10)        |
| <b>Subjects with COPD</b> | 42.6 (20)        |

Continuous variables are expressed as median [interquartile range (IQR)] and categorical variables as number of cases (%).

Supplementary Table 3: Multivariate analysis for PFS and OS in lung cancer patients

| Variable       | PFS                 |         | OS                  |         |
|----------------|---------------------|---------|---------------------|---------|
|                | HR (IC 95%)         | p-value | HR (IC 95%)         | p-value |
| Age            | 1.013 [0.991-1.035] | 0.246   | 0.998 [0.352-2.200] | 0.895   |
| Sex            | 0.753 [0.309-1.835] | 0.533   | 0.960 [0.387-2.384] | 0.931   |
| ECOG           | 1.680 [1.089-2.593] | 0.019   | 1.437 [922-2.241]   | 0.110   |
| Stage          | 1.269 [1.086-1.483] | 0.003   | 1.212 [1.036-1.418] | 0.016   |
| Smoking habits | 1.366 [0.924-2.019] | 0.118   | 1.190 [0.799-1.774] | 0.392   |
| SPINOPHILIN    | 1.683 [1.092-2.596] | 0.020   | 1.699 [1.192-2.446] | 0.022   |

Supplementary Table 4: Methylation of PPP1CA/B and C promoters in lung tumors

| Smokers       | No cancer | Cancer | p           |
|---------------|-----------|--------|-------------|
| PPP1CA        | 0.3168    | 0.2506 | 0.000016    |
| PPP1CB        | 0.2906    | 0.1538 | 0.032025R2  |
| PPP1CC        | 0.4762    | 0.5516 | 0.000007    |
| Adc (smokers) | NO CANCER | CANCER | p           |
| PPP1CA        | 0.3156    | 0.2616 | 0.011022    |
| PPP1CB        | 0.2863    | 0.1563 | 0.000011    |
| PPP1CC        | 0.4727    | 0.5399 | 0.005708    |
| SCC (Smokers) | NO CANCER | CANCER | p           |
| PPP1CA        | 0.3237    | 0.2395 | 0.0024789   |
| PPP1CB        | 0.3053    | 0.1512 | 0.032025R21 |
| PPP1CC        | 0.4794    | 0.5634 | 0.0026520   |
| Non-Smokers   | NO CANCER | CANCER | p           |
| PPP1CA        | 0.2925    | 0.2500 | 0.338367    |
| PPP1CB        | 0.2840    | 0.2568 | 0.499554    |
| PPP1CC        | 0.4529    | 0.4702 | 0.628074    |

The data shows the average mean of methylation (see Methods) in samples analyzed. In all cases Student's T test was performed and the significance indicated (p).

**Supplementary Table 5: List of genes that correlated positively or negatively with Spn (PPP1R9B), Pearson correlation  $r > 0.350$  or  $r < -0.350$  ( $p < 0.05$ ) in the Lung Squamous cell carcinoma TCGA database ( $n=81$ ).** Correlation was performed in R2: Genomics Analysis and Visualization Platform. Supplementary Table 3 is provided in the excel document.

See Supplementary File 2

**Supplementary Table 6A: GO biological processes affected by the genes with positive correlation to Spinophilin in Squamous cell lung tumors (TCGS database).** Based on Gene list from Supplementary Table 3. Performed through Enrichr web page (<http://amp.pharm.mssm.edu/Enrichr/enrich>).

See Supplementary File 3

**Supplementary Table 6B: GO biological processes affected by the genes with negative correlation to Spinophilin in Squamous cell lung tumors (TCGS database).** Based on Gene list from Supplementary Table 3. Performed through Enrichr web page (<http://amp.pharm.mssm.edu/Enrichr/enrich>).

See Supplementary File 3

**Supplementary Table 7: Summary of the different cell lines used in our study**

| Cell line | Histology | Driver mutation                          | Reference for driver mutation         |
|-----------|-----------|------------------------------------------|---------------------------------------|
| A549      | ADC       | KRAS p.G12S                              | (Helfrich, Raben et al. 2006)         |
| H460      | ADC       | KRAS p.Q61H                              | (Helfrich, Raben et al. 2006)         |
| H2009     | ADC       | KRAS p.G12A                              | COSMIC                                |
| H358      | ADC       | KRAS p.G12C                              | (Helfrich, Raben et al. 2006)         |
| H1650     | ADC       | EGFR E746-E750 del                       | (Blanco, Iwakawa et al. 2009)         |
| H1975     | ADC       | EGFR L858R/T790M                         | COSMIC                                |
| HCC827    | ADC       | EGFR E746-E750 del                       | (Helfrich, Raben et al. 2006)         |
| H3122     | ADC       | EML4-ALK v1 translocation                | COSMIC                                |
| H2228     | ADC       | EML4-ALK v3 translocation                | COSMIC                                |
| H1781     | ADC       | TN (*L858R mutation detected in our lab) | (Helfrich, Raben et al. 2006)         |
| H1437     | ADC       | TN                                       | (Helfrich, Raben et al. 2006)         |
| Calu-3    | ADC       | TN                                       | (Helfrich, Raben et al. 2006)         |
| Calu-1    | SSC       | KRAS p.G12C                              | COSMIC                                |
| HTB59     | SSC       | KRAS p-G12V                              | COSMIC                                |
| H520      | SSC       | TN                                       | COSMIC, (Helfrich, Raben et al. 2006) |
| H226      | SSC       | TN                                       | COSMIC, (Helfrich, Raben et al. 2006) |
| NL20      | NT        | TN                                       | COSMIC                                |
| NuLi-1    | NT        | TN                                       | COSMIC                                |

ADC=Adenocarcinoma, SCC=Squamous Cell Carcinoma, TN=Triple Negative, NT=Non-Tumorogenic.

Supplementary Table 8: Levels of mRNA expression of different subunits of PP1

|       | Spinophilin |        | PPP1CA  |        | PPP1CB  |        | PPP1CC  |        |
|-------|-------------|--------|---------|--------|---------|--------|---------|--------|
|       | Average     | StDev  | Average | StDev  | Average | StDev  | Average | StDev  |
| 1431  | 0.0223      | 0.0018 | 0.0331  | 0.0031 | 0.0184  | 0.0013 | 0.0334  | 0.0029 |
| 1650  | 0.0084      | 0.0006 | 0.0105  | 0.0006 | 0.0134  | 0.0007 | 0.0116  | 0.0011 |
| 1781  | 0.0197      | 0.0009 | 0.0334  | 0.001  | 0.0467  | 0.0023 | 0.0307  | 0.001  |
| 1975  | 0.0077      | 0.0002 | 0.0822  | 0.0036 | 0.0194  | 0.0014 | 0.021   | 0.0013 |
| 2009  | 0.0146      | 0.0007 | 0.0304  | 0.0013 | 0.0405  | 0.0021 | 0.0399  | 0.0028 |
| 2228  | 0.0069      | 0.0002 | 0.0144  | 0.0007 | 0.0046  | 0.0001 | 0.0143  | 0.0008 |
| 226   | 0.0067      | 0.0002 | 0.0179  | 0.0007 | 0.0134  | 0.0007 | 0.0279  | 0.0011 |
| 3122  | 0.0081      | 0.0003 | 0.0158  | 0.0004 | 0.0136  | 0.0015 | 0.0109  | 0.0002 |
| 358   | 0.0151      | 0.0004 | 0.044   | 0.0012 | 0.0449  | 0.0025 | 0.0552  | 0.0043 |
| 460   | 0.0094      | 0.0009 | 0.0091  | 0.0009 | 0.0116  | 0.0012 | 0.0212  | 0.0026 |
| 520   | 0.0064      | 0.0004 | 0.022   | 0.0013 | 0.0197  | 0.0007 | 0.0683  | 0.0039 |
| 827   | 0.0042      | 0.0003 | 0.0155  | 0.0013 | 0.0185  | 0.0014 | 0.0208  | 0.0017 |
| Calu1 | 0.0068      | 0.0004 | 0.0132  | 0.0011 | 0.0139  | 0.0008 | 0.0146  | 0.0009 |
| Calu3 | 0.0283      | 0.0014 | 0.0181  | 0.001  | 0.0195  | 0.0008 | 0.0522  | 0.0028 |
| A549  | 0.01        | 0.0001 | 0.0232  | 0.0009 | 0.0151  | 0.0008 | 0.0274  | 0.0008 |
| NL20  | 0.005       | 0.0003 | 0.0217  | 0.001  | 0.0091  | 0.0006 | 0.027   | 0.0011 |
| Nuli1 | 0.0125      | 0.0008 | 0.0242  | 0.0012 | 0.0169  | 0.0009 | 0.0265  | 0.0021 |

High Spn: 1431, 1781, 2009, 358, Calu3, Nuli1.

Low Spn: 1650, 1975, 2228, 226, 3122, 460, 520, 827, Calu1, A549, NL20.

Supplementary Table 9: IC50 of different drugs tested in the panel of lung cancer cell lines

|               | Oxaliplatin |        | Cisplatin |        | etoposide |         | Metformin |         | Bortezomib |        |
|---------------|-------------|--------|-----------|--------|-----------|---------|-----------|---------|------------|--------|
|               | IC50 (uM)   |        | IC50 (uM) |        | IC50 (uM) |         | IC50 (mM) |         | IC50 (uM)  |        |
|               | Average     | StDev  | Average   | StDev  | Average   | StDev   | Average   | StDev   | Average    | StDev  |
| <b>A549</b>   | 1.7413      | 0.0280 | 10.339    | 4.1085 | 4.0363    | 5.5257  | 3.2386    | 1.1515  | 13.3701    | 1.0221 |
| <b>Calu-1</b> | 2.2225      | 1.0236 | 0.2142    | 0.0665 | 1.1534    | 1.0104  | 11.5545   | 2.5617  | 18.6490    | 5.2137 |
| <b>Calu-3</b> | 9.1953      | 1.1379 | 0.4032    | 0.2184 | 3.5788    | 4.8779  | 15.1990   | 6.7110  | 59.9610    | 6.7221 |
| <b>H1437</b>  | 2.5605      | 0.1175 | 4.3899    | 0.1922 | 2.3559    | 2.1435  | 7.0823    | 1.5668  | 15.654     | 0.5861 |
| <b>H1650</b>  | 1.0148      | 0.2565 | 6.1025    | 2.5515 | 2.4579    | 3.1789  | 10.7731   | 1.6111  | 4.9663     | 0.8926 |
| <b>H1781</b>  | 0.7617      | 0.1123 | 0.0638    | 0.0235 | 0.3126    | 0.3896  | 8.30844   | 2.3046  | 8.9041     | 0.3519 |
| <b>H1975</b>  | 1.8063      | 0.3677 | 5.3548    | 0.5610 | 2.5096    | 2.5668  | 15.6023   | 1.2434  | 4.9767     | 0.6480 |
| <b>H2009</b>  | 1.1878      | 0.3026 | 15.2050   | 2.5136 | 5.5651    | 8.3600  | 14.5725   | 0.2609  | 21.0881    | 4.7322 |
| <b>H2228</b>  | 3.7237      | 0.1539 | 3.6015    | 0.2659 | 2.4931    | 2.0266  | 12.7885   | 4.1366  | 13.3823    | 4.9259 |
| <b>H226</b>   | 0.9970      | 0.1514 | 4.9107    | 0.1462 | 2.0197    | 2.5391  | 12.4089   | 3.5138  | 12.3963    | 0.6455 |
| <b>H3122</b>  | 0.0852      | 0.0109 | 6.3104    | 0.8980 | 2.1355    | 3.6157  | 8.8271    | 0.3994  | 16.0860    | 7.2781 |
| <b>H358</b>   | 0.9965      | 0.3338 | 0.1946    | 0.0856 | 0.5083    | 0.4285  | 14.4783   | 1.1773  | 16.7320    | 0.3541 |
| <b>H460</b>   | 0.7449      | 0.1413 | 1.9565    | 0.5650 | 0.9476    | 0.9244  | 10.3559   | 1.8699  | 61.1045    | 1.5916 |
| <b>H520</b>   | 0.5943      | 0.1953 | 2.6998    | 1.0764 | 1.1631    | 1.3456  | 14.2986   | 1.6980  | 13.6138    | 2.7517 |
| <b>HCC827</b> | 1.0856      | 0.4212 | 6.0309    | 0.9970 | 2.5126    | 3.0650  | 48.1803   | 15.7150 | 12.0709    | 0.5697 |
| <b>HTB59</b>  | 12.3497     | 3.5491 | 34.1221   | 6.1334 | 16.6736   | 15.7384 | 0.4623    | 0.1653  | 7.1309     | 1.0561 |
| <b>NL20</b>   | 4.0820      | 1.0444 | 0.0453    | 0.0059 | 1.7239    | 2.1023  | 9.4784    | 0.6953  | 7.2196     | 0.3583 |
| <b>NuLi-1</b> | 1.3710      | 0.4178 | 0.0370    | 0.0083 | 0.6086    | 0.687   | 4.0813    | 1.8089  | 3.3829     | 0.7317 |

Data from 3 independent experiments performed in triplicate.
